# Supplementary material for: On the Statistical Relationship between Sea Ice Freeboard and C-Band Microwave Backscatter – A Study with Sentinel-1 and Operation IceBridge
Source: Copernicus journal article supplement (doi:10.5194/egusphere-2025-1069), 2025-03-12
Supplement: Supplementary file 1 [file egusphere-2025-1069-supplement.pdf]

Supplementary to “On the Statistical  
Relationship between Sea Ice Freeboard and  
C-Band Microwave Backscatter – A Study with  
Sentinel-1 and Operation IceBridge”

March 6, 2025

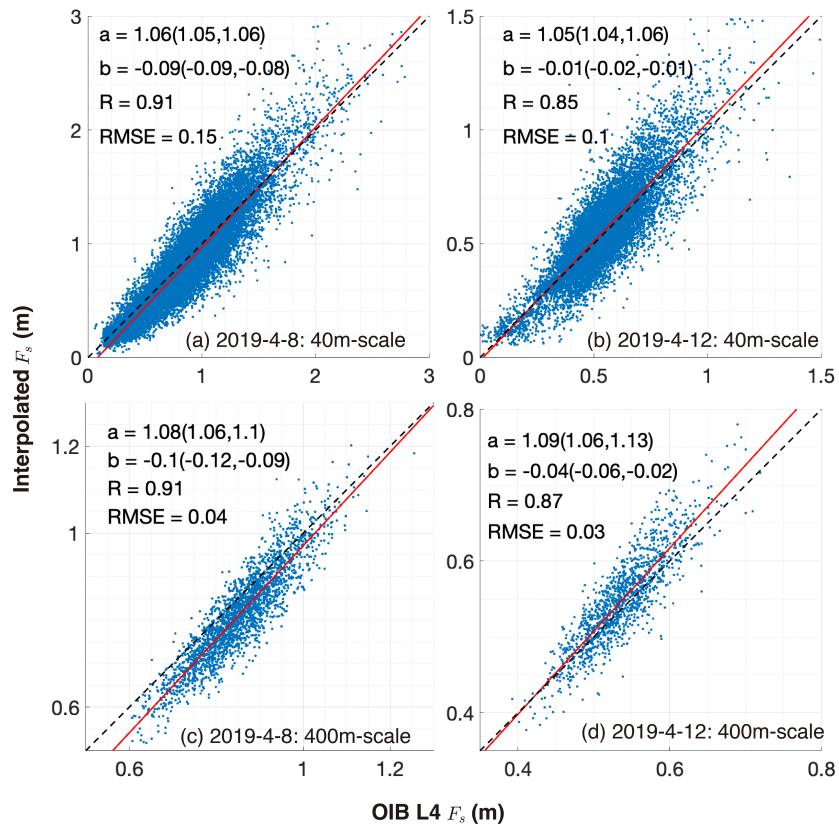

Figure S1: Consistency of the interpolated  $F_s$  and the Operation IceBridge (OIB) standard Level 4 product. The 40m coarsened  $F_s$  based on the 1m-scale  $F_s$  map is compared with the standard OIB product (top row) for both days: April 8th (left column) and April 12th (right column). The along-track 10-footprint mean  $F_s$  comparison for both days is shown in the second row.

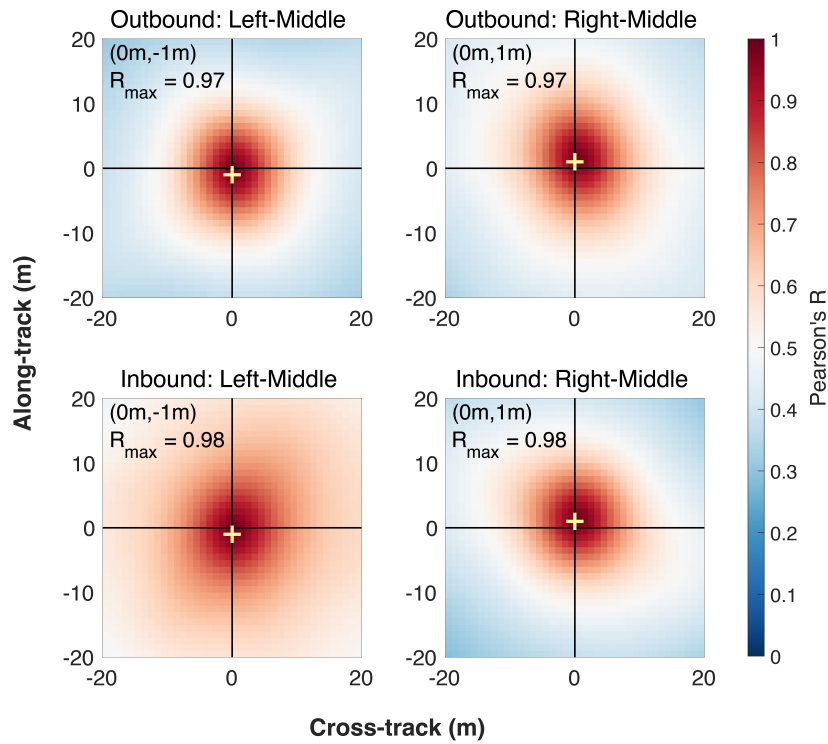

Figure S2: Correlation maps of  $F_s$  (1m-scale) between different OIB passes for the outbound (top row) and the inbound (bottom row) sample segment on April 8th, 2019 (see also Fig. 2).

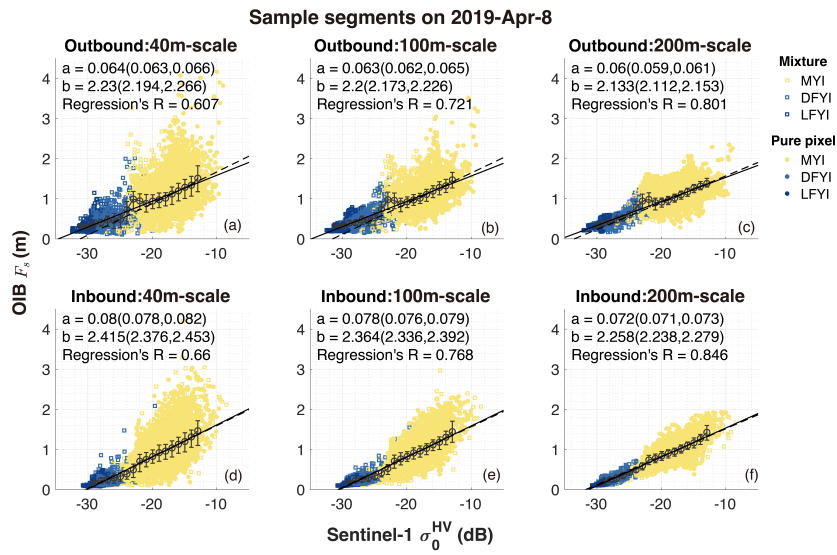

Figure S3: Scattered plot of the relationship between  $F_s$  and the Sentinel-1 C-band backscatter ( $\sigma_0$ ) in the H-V polarization channel for the sample segment on April 8th, 2019. Same as in Fig. 2, three spatial scales of  $F_s$  are adopted for matching to the 40m-resolution  $\sigma_0$  product: 40m (left column), 100m (middle column) and 200m (right column).

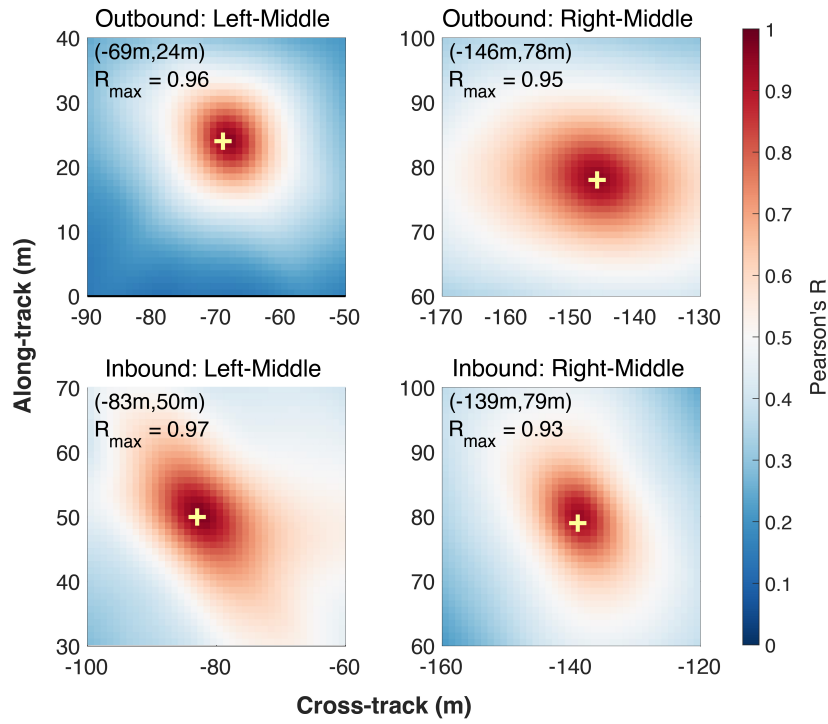

Figure S4: Same as Fig. S2, but for the sample segment on April 12th, 2019 (see also Fig. 3).

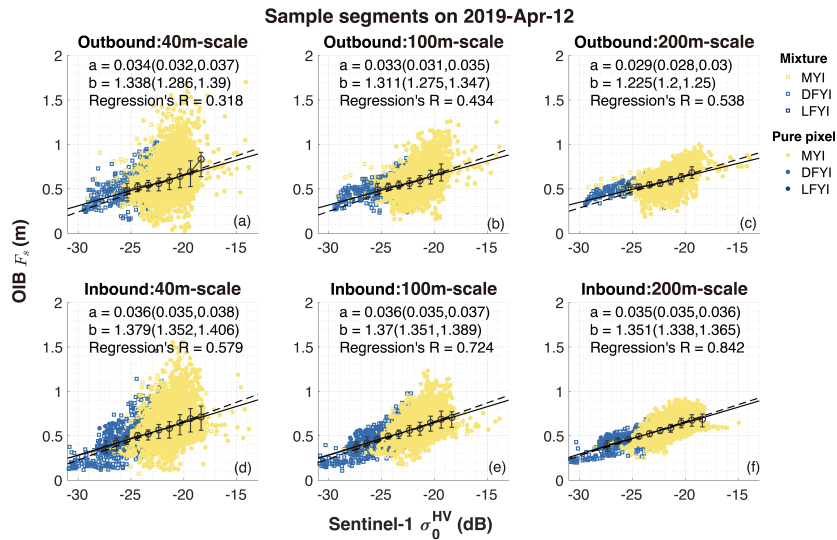

Figure S5: Same as Fig. S3, but for the sample segment on April 12th, 2019.

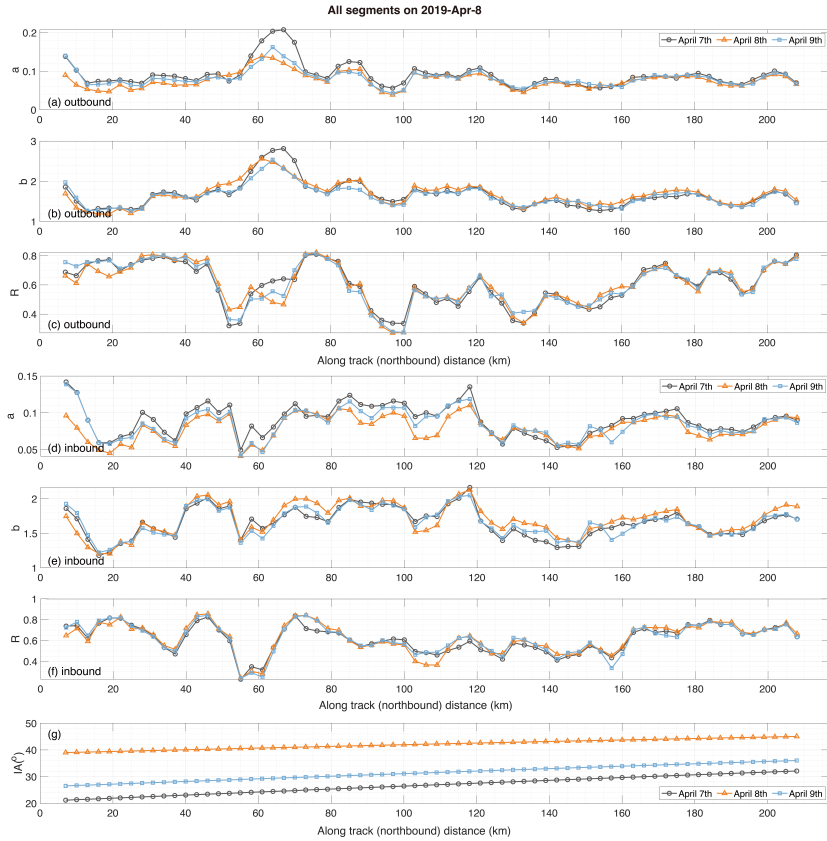

Figure S6: The linear regression ( $\overline{F_s} = a \cdot \sigma_0 + b$ ) are established using the 200m-scale OIB  $F_s$  and 40m-scale  $\sigma_0$  for all segments on April 8th (panels a-f). The  $\sigma_0$  data were derived from three Sentinel-1 images acquired on April 7th, 8th, and 9th. The corresponding IA variations along the whole OIB track on April 8th are shown in panel g.

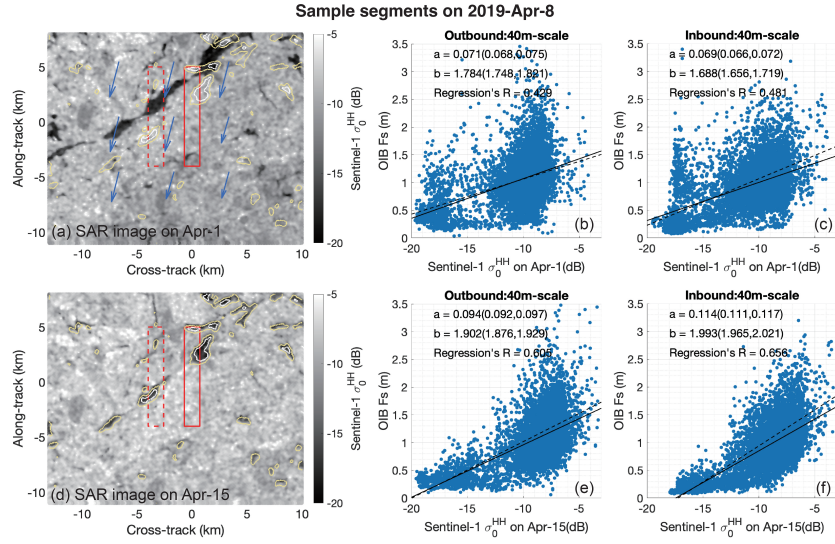

Figure S7: Collocation between the  $F_s$  map for the sample segment on April 8th and the Sentinel-1 maps ( $\sigma_0^{HH}$ ) from April 1st (top row) and April 12th (second row).

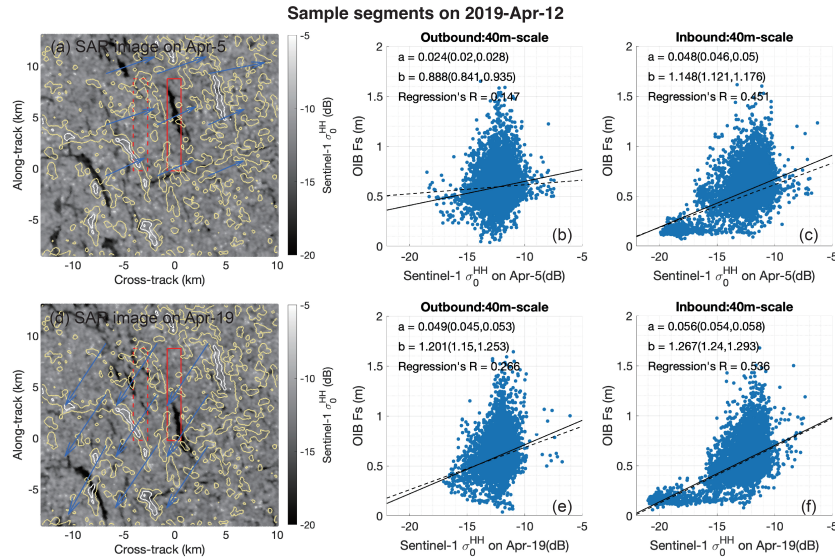

Figure S8: Collocation between the  $F_s$  map for the sample segment on April 12th and the Sentinel-1 maps ( $\sigma_0^{HH}$ ) from April 5th (top row) and April 19th (second row).

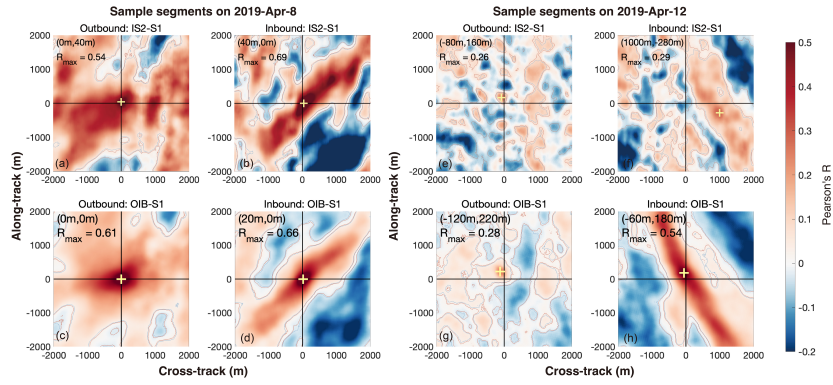

Figure S9: Correlation maps of  $F_s$  on IS2 strong and weak beam segments and Sentinel-1 backscatter (HH channel) for the sample segment on April 8th (left panels) and 12th (right panels). The correlation maps in Fig. 2 and 3 are also shown in the lower row for comparison.
